# Supplementary material
Source: PubMed Central journal article supplement (PMC3412033)
Supplement: 1208616109_pnas.201208616SI.pdf [file 1208616109_pnas.201208616SI.pdf]

# Supporting Information

Shimbo et al. 10.1073/pnas.1208616109

## SI Text

Scripts 1-4 are available upon request.

**Script 1.** Converts html formatted results from Protein Prospector into a text file.

**Script 2.** Generates SRM transitions (parent ion and fragment ion pairs) for 5500QTRAP using output text files from Script 1. The top seven most intense fragment ions,  $m/z$  between 300 and 1,200, excluding Immonium ions,  $a_1$ ,  $b_1$ ,  $y_1$ , and fragments with  $m/z$  2 Da of the precursor ion, were selected from the MS/MS spectrum for each identified peptide and the tentative collision energies were calculated as follows: for doubly charged precursor ions,  $[CE(V)] = 0.03 \times [m/z \text{ value}] + 20$ ; for triply charged precursor ions,  $[CE(V)] = 0.03 \times [m/z \text{ value}] + 18$ ; for quadrivalent or more charged precursor ions,  $[CE(V)] = 0.013 \times [m/z \text{ value}] + 27$ . For each transition, a collision energy scan ( $[CE(V)] - 10, -5, \pm 0, +5$  and  $+10$ ) was performed to optimize CE values.

**Script 3.** Performs moving average smoothing with weighted Gaussian distribution for the five nearest data points. This script also adjusts the retention time.

**Script 4.** Calculates area-under-curve of each peptide peak.

## SI Methods

**Data Analysis and Bioinformatics.** All of the data from scheduled SRM experiments were processed using in-house perl scripts (*SI Text*) and Microsoft Excel. The peptides were qualified by at

least five of seven coeluting transitions on HPLC in one or more samples. For the peak intensity integration, three common observed transitions for each peptide were selected to calculate the area-under-the-curve (AUC). For quantitative analysis, the ratio of AUCs for the three common peaks were determined and if the rms was less than 0.4 and peak intensities less than  $1.0e^4$ , the peptide was discarded. The intensities from each sample were normalized with the average intensity of internal standards and total protein concentration (using a BCA assay). Cluster analyses were performed using Cluster (v3.0) and Java TreeView (v1.1.5r2). Go Miner was used for the GO analyses (1). To select specific peptides, averaged intensities were used to calculate  $P$  value from  $t$  test and fold-change against the other conditions. The scores were calculated from  $(\text{Score}) = -\log_{10}(P) \times \log_2(\text{fold-change})$ . Selected peptides listed in Table S2 and Table S3 scored greater 2 SDs from the averaged score.

## Immunoblotting of Caspase Cleavages and Cell Viability Assays.

Whole-cell lysates ( $1.0 \times 10^7$  cells) were prepared in RIPA buffer (25 mM Tris-HCl, 150 mM sodium chloride, 1% sodium deoxycholate, 0.1% SDS and 1% Triton X-100) containing the protease inhibitors (described above). The protein concentrations were measured by BCA method and 25  $\mu$ g of protein were subjected to SDS/PAGE and transferred to nitrocellulose membranes. Blots were performed using the CREB-2 Antibody (sc-200; Santa Cruz Biotechnology) as the primary antibody and Amersham ECL-HRP Linked Secondary Antibodies (NA934; GE Healthcare).

1. Zeeberg BR, et al. (2003) GoMiner: A resource for biological interpretation of genomic and proteomic data. *Genome Biol* 4:R28.

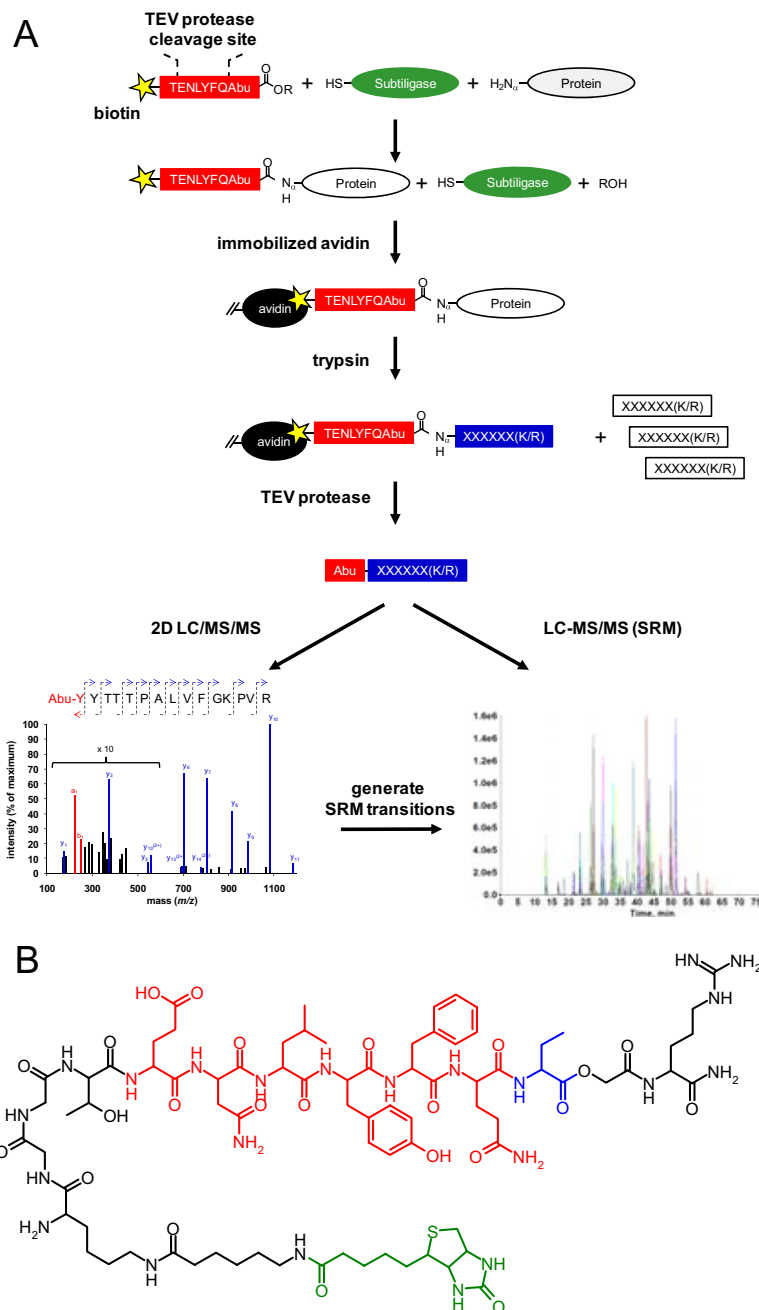

**Fig. S1.** Positive N-terminal enrichment strategy. (A) The free  $\alpha$ -amines are labeled with biotinylated ester with the engineered enzyme subtiligase and captured on neutravidin beads. The peptides are cleaved by TEV (Tobacco etch virus) protease leaving an N-terminal remnant of the noncanonical amino acid,  $\alpha$ -aminobutyric acid (Abu), which serves as a marker of subtiligase labeling. (B) TEVest4. The biotinylated ester, contains biotin (green), a  $\alpha$ -aminohexanoic acid-di-glycine spacer, the TEV protease cleavage site (ENLYFQ, red), Abu (blue), and the ester, which is cleaved to generate the activated thiol-ester on subtiligase. Subtiligase then transfers Abu specifically to the  $\alpha$ -amines on proteins and not  $\epsilon$ -amines, free amino acids, or di-peptides (1).

1. Chang TK, Jackson DY, Burnier JP, Wells JA (1994) Subtiligase: A tool for semisynthesis of proteins. *Proc Natl Acad Sci USA* 91:12544–12548.

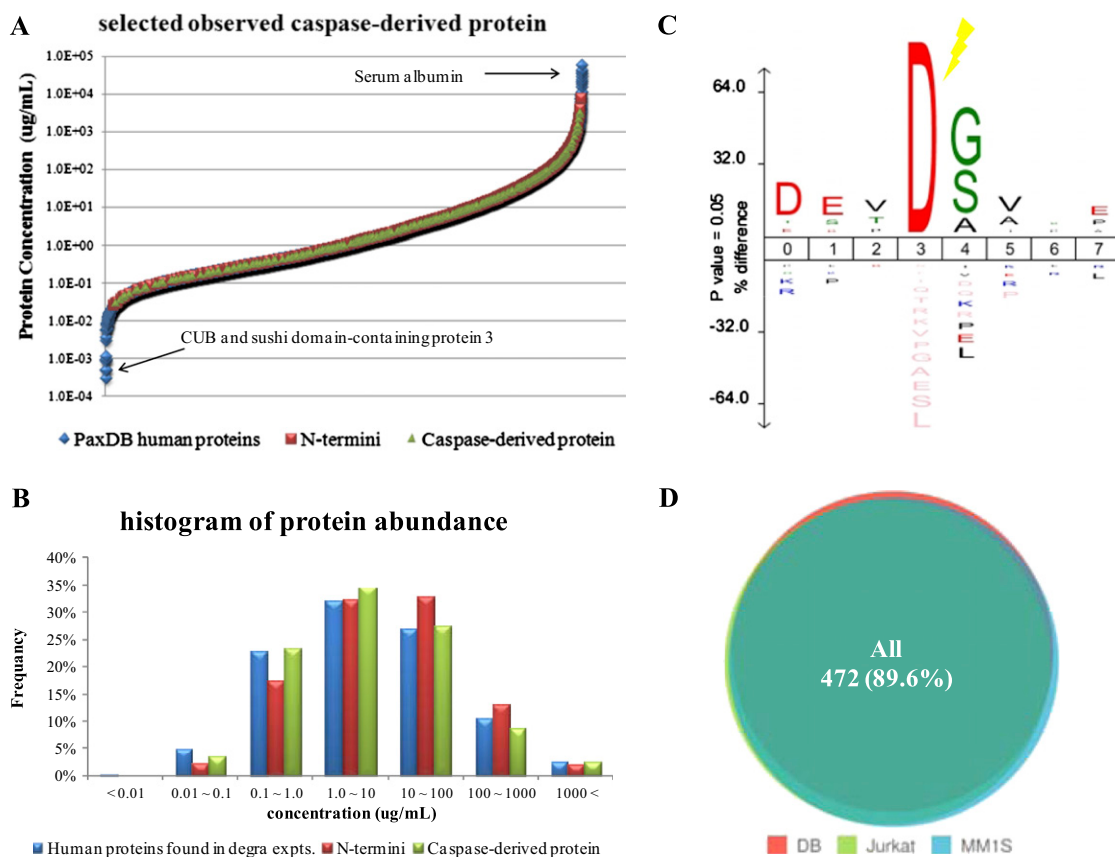

**Fig. S2.** Evaluation of stage 1 experiments. (A) Distribution of the identified proteins. Total observed N termini (red) and caspase-derived N termini (green) are plotted on the protein abundance data (blue) from PaxDb (pax-db.org). Note that most of the high-abundance proteins are serum-derived and thus not expected to be present in our datasets. (B) Histogram of detected proteins versus their abundance. (C) IceLogo of the caspase-derived peptides from stage 1A. The amino acid frequency of the whole proteome annotated from the UniProt knowledge base was used to establish background frequency. IceLogo of caspase-derived peptides (aspartic acid at P1 position) showed the characteristic caspase cleavage site where cleavage occurs between aspartic acid and a small amino acid (1). The most common sequence from P4–P1 was DEVD, which is typical of caspases 3 and 7 (2). (D) Strong overlap of peptides (89.6%) detected in the three cell lines. Selected reaction monitoring (SRM) analysis of apoptotic cell lysates detected 488, 505, and 520 peptides in DB, Jurkat, and MM1S cell lines, respectively, with 472 peptides present in all three cell lines.

1. Colaert N, Helsens K, Martens L, Vandekerckhove J, Gevaert K (2009) Improved visualization of protein consensus sequences by iceLogo. *Nat Methods* 6:786–787.
2. Schechter I, Berger A (1968) On the active site of proteases. 3. Mapping the active site of papain; Specific peptide inhibitors of papain. *Biochem Biophys Res Commun* 32:898–902.

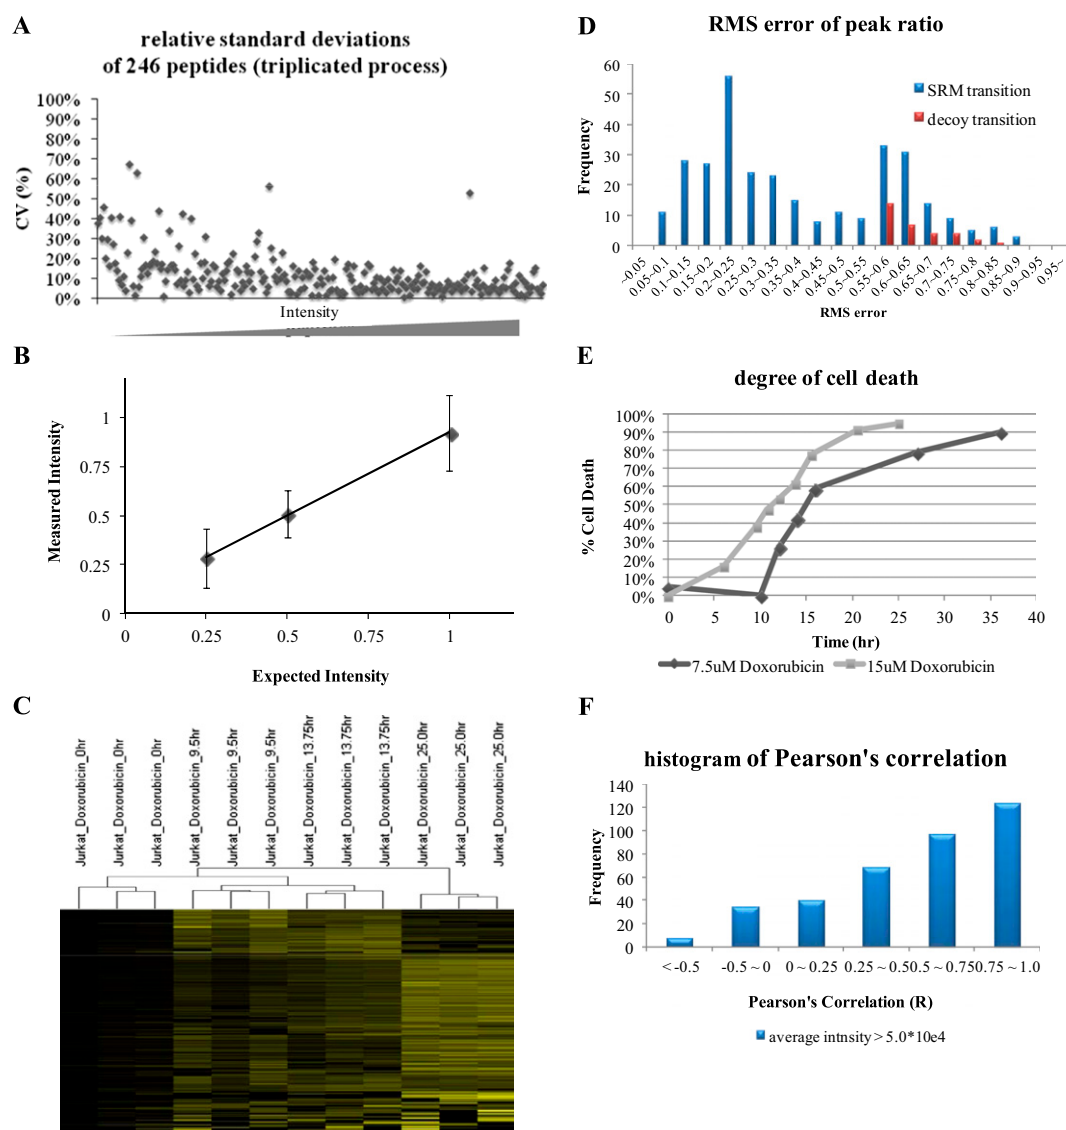

**Fig. S3.** Method validation for quantitative analysis. (A) Reproducibility of processing three individual ligations using same lysate. Averaged coefficient of variation (CV) was 12.3% for peptides with intensities  $>1.0 \times 10^4$ . (B) Linearity. Cell lysate were serially diluted, processed with subtiligase, and subjected to MS. The strong correlation suggests good reproducibility and linearity of response. (C) Analytical replication for three identical Jurkat cell samples treated with doxorubicin over four time points and processed for SRM analysis. An unbiased clustering algorithm groups the three replicates for each of the four time points. (D) Estimation of the false-discovery rates on SRM analysis. Decoy transitions were generated by randomizing amino acid sequence and comparing the relative signal intensity of the identified peptide transitions. No decoy transition had calculated rms errors  $> 0.5$ . All peptides classified as being quantified by SRM had calculated rms errors  $< 0.4$ . (E and F) Biological reproducibility. Jurkat cells were treated with two different doxorubicin concentrations and harvested at similar degrees of cell death (E) and a histogram of the Pearson's correlation coefficients for peptides with intensities  $> 5.0 \times 10^4$  is shown (F).



**Table S2. Selected specific peptides and caspase targets unique to MM1S and Bortezomib in all three cell lines**

| Entry*            | Protein names                                                 |
|-------------------|---------------------------------------------------------------|
| <b>MM1S cells</b> |                                                               |
| Q15306_181        | IFN regulatory factor 4                                       |
| P47712_523        | Cytosolic phospholipase A2                                    |
| P04233_23         | HLA class II histocompatibility antigen $\gamma$ -chain       |
| Q9H2L5_123        | Ras association domain-containing protein 4                   |
| O60907_137        | F-box-like/WD repeat-containing protein TBL1X                 |
| Q96MG2_13         | Junctional sarcoplasmic reticulum protein 1                   |
| O43182_366        | Rho GTPase-activating protein 6                               |
| P57764_276        | Gasdermin-D                                                   |
| Q14157_851        | Ubiquitin-associated protein 2-like                           |
| <b>Bortezomib</b> |                                                               |
| Q9H6S0_1084       | Probable ATP-dependent RNA helicase YTHDC2                    |
| Q1KMD3_127        | Heterogeneous nuclear ribonucleoprotein U-like protein 2      |
| Q13541_26         | Eukaryotic translation initiation factor 4E-binding protein 1 |
| Q96GA3_206        | Protein LTV1 homolog                                          |
| Q9UMZ2_988        | Synerglin- $\gamma$                                           |
| P63241_12         | Eukaryotic translation initiation factor 5A-1                 |
| P18848_66         | cAMP-dependent transcription factor ATF-4                     |
| Q9UBQ7_29         | Glyoxylate reductase/hydroxypyruvate reductase                |
| P51991_116        | Heterogeneous nuclear ribonucleoprotein A3                    |
| O14787_354        | Transportin-2                                                 |
| Q9NTJ3_25         | Structural maintenance of chromosomes protein 4               |
| Q7KZF4_189        | Staphylococcal nuclease domain-containing protein 1           |
| Q6ZUJ8_149        | Phosphoinositide 3-kinase adapter protein 1                   |
| P23246_458        | Splicing factor, proline- and glutamine-rich                  |
| P49792_3132       | E3 SUMO-protein ligase RanBP2                                 |
| P35749_1161       | Myosin-11                                                     |
| Q9ULR0_168        | Pre-mRNA-splicing factor ISY1 homolog                         |
| Q5T4S7_581        | E3 ubiquitin-protein ligase UBR4                              |
| Q15181_166        | Inorganic pyrophosphatase                                     |
| Q12982_84         | BCL2/adenovirus E1B 19 kDa protein-interacting protein 2      |
| P35580_1161       | Myosin-10                                                     |

See *Methods* for scoring.

\*UniProt accession number with position.

**Table S3. Selected specific peptides**

| Entry*                                                              | Protein names                                                  |
|---------------------------------------------------------------------|----------------------------------------------------------------|
| <b>DB cells</b>                                                     |                                                                |
| P14866_285                                                          | Heterogeneous nuclear ribonucleoprotein L                      |
| Q13451_186                                                          | Peptidyl-prolyl <i>cis-trans</i> isomerase FKBP5               |
| P27797_122                                                          | Calreticulin                                                   |
| P04637_187                                                          | Cellular tumor antigen p53                                     |
| Q9ULZ2_171                                                          | Signal-transducing adaptor protein 1                           |
| Q8IUI8_332                                                          | Cytokine receptor-like factor 3                                |
| Q04864_87                                                           | Proto-oncogene c-Rel                                           |
| P21359_669                                                          | Neurofibromin                                                  |
| P84022_259                                                          | Mothers against decapentaplegic homolog 3                      |
| P55884_185                                                          | Eukaryotic translation initiation factor 3 subunit B           |
| Q04206_98                                                           | Transcription factor p65                                       |
| P20810_234                                                          | Calpastatin                                                    |
| P52565_144                                                          | Rho GDP-dissociation inhibitor 1                               |
| P27708_1887                                                         | CAD protein                                                    |
| Q8N999_60                                                           | Uncharacterized protein C12orf29                               |
| P49006_64                                                           | MARCKS-related protein                                         |
| Q99615_9                                                            | DnaJ homolog subfamily C member 7                              |
| <b>Jurkat cells</b>                                                 |                                                                |
| P78559_1885                                                         | Microtubule-associated protein 1A                              |
| Q53F19_232                                                          | Uncharacterized protein C17orf85                               |
| P07602_313                                                          | Proactivator polypeptide                                       |
| Q9Y6K1_439                                                          | DNA (cytosine-5)-methyltransferase 3A                          |
| Q92664_19                                                           | Transcription factor IIIA                                      |
| P57764_88                                                           | Gasdermin-D                                                    |
| P21333_1337                                                         | Filamin-A                                                      |
| O43719_34                                                           | HIV Tat-specific factor 1                                      |
| P23381_84                                                           | Tryptophanyl-tRNA synthetase, cytoplasmic                      |
| Q8WUA2_233                                                          | Peptidyl-prolyl <i>cis-trans</i> isomerase-like 4              |
| Q9H8V3_629                                                          | Protein ECT2                                                   |
| Q86XP1_699                                                          | Diacylglycerol kinase $\eta$                                   |
| Q96JM3_586                                                          | Zinc finger protein 828                                        |
| Q92619_663                                                          | Minor histocompatibility protein HA-1                          |
| Q92917_38                                                           | G patch domain and KOW motifs-containing protein               |
| O14686_387                                                          | Histone-lysine <i>N</i> -methyltransferase MLL2                |
| Q96IZ7_239                                                          | Serine/Arginine-related protein 53                             |
| Q12888_830                                                          | Tumor suppressor p53-binding protein 1                         |
| <b>Treatment with the proteasome inhibitor, Bortezomib or MG132</b> |                                                                |
| P28070_30                                                           | Proteasome subunit $\beta$ type-4                              |
| Q6FIF0_107                                                          | AN1-type zinc finger protein 6                                 |
| P18848_66                                                           | cAMP-dependent transcription factor ATF-4                      |
| P47712_523                                                          | Cytosolic phospholipase A2                                     |
| Q5JRA6_710                                                          | Melanoma inhibitory activity protein 3                         |
| Q9UMZ2_988                                                          | Synergin- $\gamma$                                             |
| Q9H8Y5_135                                                          | Ankyrin repeat and zinc finger domain-containing protein 1     |
| Q9UN37_231                                                          | Vacuolar protein sorting-associated protein 4A                 |
| P61978_351                                                          | Heterogeneous nuclear ribonucleoprotein K                      |
| Q8TCG2_15                                                           | Phosphatidylinositol 4-kinase type 2- $\beta$                  |
| Q13541_26                                                           | Eukaryotic translation initiation factor 4E-binding protein 1  |
| Q96MG2_13                                                           | Junctional sarcoplasmic reticulum protein 1                    |
| Q9NZJ5_774                                                          | Eukaryotic translation initiation factor 2- $\alpha$ kinase 3  |
| Q1KMD3_127                                                          | Heterogeneous nuclear ribonucleoprotein U-like protein 2       |
| P63241_12                                                           | Eukaryotic translation initiation factor 5A-1                  |
| Q9ULR0_168                                                          | Pre-mRNA-splicing factor ISY1 homolog                          |
| Q9BTC0_410                                                          | Death-inducer obliterator 1                                    |
| Q7L014_923                                                          | Probable ATP-dependent RNA helicase DDX46                      |
| Q8TEQ0_183                                                          | Sorting nexin-29                                               |
| <b>Treatment with the broad kinase inhibitor, staurosporine</b>     |                                                                |
| Q5BJE1_518                                                          | Uncharacterized protein C18orf34                               |
| Q14C86_1103                                                         | GTPase-activating protein and VPS9 domain-containing protein 1 |
| P26368_129                                                          | Splicing factor U2AF 65-kDa subunit                            |
| Q96PK2_3523                                                         | Microtubule-actin cross-linking factor 1, isoform 4            |
| Q2NKK8_1036                                                         | DNA excision repair protein ERCC-6-like                        |

Table S3. Cont.

| Entry*                                             | Protein names                                                         |
|----------------------------------------------------|-----------------------------------------------------------------------|
| Q15365_221                                         | Poly(rC)-binding protein 1                                            |
| Q9H0H5_274                                         | Rac GTPase-activating protein 1                                       |
| P09496_77                                          | Clathrin light chain A                                                |
| Q9H5J8_11                                          | TATA box-binding protein-associated factor RNA polymerase I subunit D |
| Q96G28_142                                         | Coiled-coil domain-containing protein 104                             |
| Q9C0C9_438                                         | Ubiquitin-conjugating enzyme E2 O                                     |
| Q06210_261                                         | Glucosamine-fructose-6-phosphate aminotransferase                     |
| P68363_70                                          | Tubulin $\alpha$ -1B chain                                            |
| Q7Z616_908                                         | Rho GTPase-activating protein 30                                      |
| P43243_681                                         | Matrin-3                                                              |
| Q92917_38                                          | G patch domain and KOW motifs-containing protein                      |
| P06400_347                                         | Retinoblastoma-associated protein                                     |
| Q9Y5A9_368                                         | YTH domain family protein 2                                           |
| O60784_158                                         | Target of Myb protein 1                                               |
| Q6NZY4_344                                         | Zinc finger CCHC domain-containing protein 8                          |
| Q16576_99                                          | Histone-binding protein RBBP7                                         |
| Q15424_263                                         | Scaffold attachment factor B1                                         |
| Q14693_166                                         | Phosphatidate phosphatase LPIN1                                       |
| Q13136_219                                         | Liprin- $\alpha$ -1                                                   |
| Q8N5W9_62                                          | Protein FAM101B                                                       |
| P17544_44                                          | cAMP-dependent transcription factor ATF-7                             |
| Treatment with the DNA damaging agent, doxorubicin |                                                                       |
| P35637_356                                         | RNA-binding protein FUS                                               |
| P54252_218                                         | Ataxin-3                                                              |
| P31939_340                                         | Bifunctional purine biosynthesis protein PURH                         |
| P78559_1885                                        | Microtubule-associated protein 1A                                     |
| Q5T457_2904                                        | E3 ubiquitin-protein ligase UBR4                                      |
| P43686_298                                         | 26S protease regulatory subunit 6B                                    |
| Q3B7T1_116                                         | Erythroid differentiation-related factor 1                            |
| Q06546_16                                          | GA-binding protein $\alpha$ -chain                                    |
| Q8WYQ5_397                                         | Microprocessor complex subunit DGCR8                                  |
| Q13043_350                                         | Serine/threonine-protein kinase 4                                     |
| O15042_713                                         | U2 snRNP-associated SURP motif-containing protein                     |
| P60709_158                                         | Actin, cytoplasmic 1                                                  |
| Q8IW35_434                                         | Centrosomal protein of 97 kDa                                         |
| P25205_702                                         | DNA replication licensing factor MCM3                                 |
| O75533_35                                          | Splicing factor 3B subunit 1                                          |
| Q9Y2X3_125                                         | Nucleolar protein 58                                                  |
| O43719_34                                          | HIV Tat-specific factor 1                                             |
| Q965B3_552                                         | Neurabin-2                                                            |
| Q96B23_45                                          | Uncharacterized protein C18orf25                                      |
| O94913_1289                                        | Pre-mRNA cleavage complex 2 protein Pcf11                             |
| P21333_1049                                        | Filamin-A                                                             |
| Q92619_40                                          | Minor histocompatibility protein HA-1                                 |
| P17980_28                                          | 26S protease regulatory subunit 6A                                    |
| Q5JSZ5_1777                                        | Protein PRRC2B                                                        |
| Q12888_318                                         | Tumor suppressor p53-binding protein 1                                |
| P35251_724                                         | Replication factor C subunit 1                                        |
| O14974_73                                          | Protein phosphatase 1 regulatory subunit 12A                          |

Caspase targets specific for DB and Jurkat cells, and treatment with proteasome inhibitors Bortezomib or MG132, staurosporine, or doxorubicin. See *Methods* for scoring.

\*UniProt accession number with position.

**Table S4. Proteins correlated to degree of cell death among all conditions (average  $R > 0.75$  and minimum  $R > 0.5$ )**

| Entry*      | Protein names                                                               | Averaged $R$ | Catalytic efficiency† |
|-------------|-----------------------------------------------------------------------------|--------------|-----------------------|
| O43719_40   | HIV Tat-specific factor 1                                                   | 0.87         | ✓                     |
| O60664_220  | Perilipin-3                                                                 | 0.86         | ✓                     |
| Q14839_1234 | Chromodomain-helicase-DNA-binding protein 4                                 | 0.85         |                       |
| Q92945_129  | Far upstream element-binding protein 2                                      | 0.84         | ✓                     |
| Q96MG7_42   | Melanoma-associated antigen G1                                              | 0.83         | ✓                     |
| Q13614_49   | Myotubularin-related protein 2                                              | 0.83         |                       |
| Q07666_76   | KH domain-containing, RNA-binding, signal transduction-associated protein 1 | 0.83         | ✓                     |
| P61978_129  | Heterogeneous nuclear ribonucleoprotein K                                   | 0.82         | ✓                     |
| Q14498_332  | RNA-binding protein 39                                                      | 0.81         | ✓                     |
| Q92538_369  | Golgi-specific brefeldin A-resistance guanine nucleotide exchange factor 1  | 0.80         |                       |
| Q8N1F7_158  | Nuclear pore complex protein Nup93                                          | 0.78         | ✓                     |
| Q15154_194  | Pericentriolar material 1 protein                                           | 0.77         |                       |
| Q8N3X1_154  | Formin-binding protein 4                                                    | 0.77         |                       |
| P45974_783  | Ubiquitin carboxyl-terminal hydrolase 5                                     | 0.77         | ✓                     |
| Q9GZR7_297  | ATP-dependent RNA helicase DDX24                                            | 0.76         |                       |

\*UniProt accession number with position

†Described as higher catalytic efficiencies for caspases (ref. 1)

1. Agard NJ, et al. (2012) Global kinetic analysis of proteolysis via quantitative targeted proteomics. *Proc Natl Acad Sci* 109:1913–1918.

#### **Dataset S1. List of N-terminal peptides identified from apoptotic cells in stage 1A discovery experiment**

[Dataset S1](#)

#### **Dataset S2. Generated SRM transitions for QTRAP 5500**

[Dataset S2](#)

Control peptides are in bold.

#### **Dataset S3. Calculated intensities of SRM results from stages 1 and 2**

[Dataset S3](#)

(A) Calculated intensities of SRM results from stage 1B. (B) Calculated intensities of SRM results from stage 2 (in bold are the 628 peptides shown in Fig. 2).
